# Supplementary material for: Tangshen Formula Improves Diabetes-Associated Myocardial Fibrosis by Inhibiting TGF-β/Smads and Wnt/β-Catenin Pathways
Source: Frontiers journal article supplement (doi:10.3389/fmed.2021.732042), 2021-12-06
Supplement: Data_Sheet_1.ZIP [file Data_Sheet_1.ZIP]

## Sheet: Results
Well	Well Position	Omit	Sample Name	Target Name	Task	Reporter	Quencher	Quantity	Quantity Mean	Quantity SD	RQ	RQ Min	RQ Max	CT	Ct Mean	Ct SD	Delta Ct	Delta Ct Mean	Delta Ct SD	Delta Ct SE	Delta Delta Ct	Automatic Ct Threshold	Ct Threshold	Automatic Baseline	Baseline Start	Baseline End	Amp Status	Comments	Cq Conf	DRNMIN	Tm1	HIGHSD	Tm2	Tm3	Tm4
61	F1	FALSE	0-16h	a-SMA	UNKNOWN	SYBR	None							21.2648	21.2008	0.247172						TRUE	16556.7	TRUE	3	13	Amp		0.985567	N	86.2841	N
62	F2	FALSE	0-16h	a-SMA	UNKNOWN	SYBR	None							20.9279	21.2008	0.247172						TRUE	16556.7	TRUE	3	12	Amp		0.98426	N	86.1304	N
63	F3	FALSE	0-16h	a-SMA	UNKNOWN	SYBR	None							21.4096	21.2008	0.247172						TRUE	16556.7	TRUE	3	15	Amp		0.988952	N	86.1304	N
1	A1	FALSE	0-6h	a-SMA	UNKNOWN	SYBR	None							21.1043	21.1521	0.135268						TRUE	16556.7	TRUE	3	14	Amp		0.985222	N	86.5916	N
2	A2	FALSE	0-6h	a-SMA	UNKNOWN	SYBR	None							21.0473	21.1521	0.135268						TRUE	16556.7	TRUE	3	13	Amp		0.984793	N	86.4378	N
3	A3	FALSE	0-6h	a-SMA	UNKNOWN	SYBR	None							21.3048	21.1521	0.135268						TRUE	16556.7	TRUE	3	12	Amp		0.980087	N	86.4378	N
28	C4	FALSE	15-16h	a-SMA	UNKNOWN	SYBR	None							20.4799	20.4598	0.0455431						TRUE	16556.7	TRUE	3	12	Amp		0.985486	N	86.2841	N
29	C5	FALSE	15-16h	a-SMA	UNKNOWN	SYBR	None							20.4918	20.4598	0.0455431						TRUE	16556.7	TRUE	3	12	Amp		0.968997	N	86.2833	N
30	C6	FALSE	15-16h	a-SMA	UNKNOWN	SYBR	None							20.4076	20.4598	0.0455431						TRUE	16556.7	TRUE	3	13	Amp		0.988306	N	86.2833	N
4	A4	FALSE	10-16h	a-SMA	UNKNOWN	SYBR	None							20.9172	20.6731	0.216444						TRUE	16556.7	TRUE	3	14	Amp		0.988074	N	86.4378	N
5	A5	FALSE	10-16h	a-SMA	UNKNOWN	SYBR	None							20.5044	20.6731	0.216444						TRUE	16556.7	TRUE	3	13	Amp		0.98703	N	86.437	N
6	A6	FALSE	10-16h	a-SMA	UNKNOWN	SYBR	None							20.5978	20.6731	0.216444						TRUE	16556.7	TRUE	3	15	Amp		0.980879	N	86.437	N
37	D1	FALSE	10-6h	a-SMA	UNKNOWN	SYBR	None							21.3501	21.2648	0.168035						TRUE	16556.7	TRUE	3	13	Amp		0.986771	N	86.2841	N
38	D2	FALSE	10-6h	a-SMA	UNKNOWN	SYBR	None							21.0713	21.2648	0.168035						TRUE	16556.7	TRUE	3	12	Amp		0.983861	N	86.1304	N
39	D3	FALSE	10-6h	a-SMA	UNKNOWN	SYBR	None							21.3732	21.2648	0.168035						TRUE	16556.7	TRUE	3	14	Amp		0.986429	N	86.1304	N
64	F4	FALSE	10-72h	a-SMA	UNKNOWN	SYBR	None							19.4813	19.7467	0.23126						TRUE	16556.7	TRUE	3	10	Amp		0.986506	N	86.1304	N
65	F5	FALSE	10-72h	a-SMA	UNKNOWN	SYBR	None							19.9052	19.7467	0.23126						TRUE	16556.7	TRUE	3	14	Amp		0.95743	N	86.2833	N
66	F6	FALSE	10-72h	a-SMA	UNKNOWN	SYBR	None							19.8536	19.7467	0.23126						TRUE	16556.7	TRUE	3	12	Amp		0.983734	N	86.1296	N
16	B4	FALSE	0-72h	a-SMA	UNKNOWN	SYBR	None							20.9992	21.2444	0.248586						TRUE	16556.7	TRUE	3	12	Amp		0.980098	N	86.2841	N
17	B5	FALSE	0-72h	a-SMA	UNKNOWN	SYBR	None							21.4962	21.2444	0.248586						TRUE	16556.7	TRUE	3	15	Amp		0.971444	N	86.2833	N
18	B6	FALSE	0-72h	a-SMA	UNKNOWN	SYBR	None							21.2377	21.2444	0.248586						TRUE	16556.7	TRUE	3	12	Amp		0.974346	N	86.2833	N
49	E1	FALSE	15-6h	a-SMA	UNKNOWN	SYBR	None							20.5189	20.5645	0.0413522						TRUE	16556.7	TRUE	3	12	Amp		0.980811	N	86.2841	N
50	E2	FALSE	15-6h	a-SMA	UNKNOWN	SYBR	None							20.5997	20.5645	0.0413522						TRUE	16556.7	TRUE	3	16	Amp		0.980652	N	86.1304	N
51	E3	FALSE	15-6h	a-SMA	UNKNOWN	SYBR	None							20.5748	20.5645	0.0413522						TRUE	16556.7	TRUE	3	12	Amp		0.986786	N	86.1304	N
76	G4	FALSE	15-72h	a-SMA	UNKNOWN	SYBR	None							20.2275	20.2009	0.150005						TRUE	16556.7	TRUE	3	14	Amp		0.976524	N	86.1304	N
77	G5	FALSE	15-72h	a-SMA	UNKNOWN	SYBR	None							20.0393	20.2009	0.150005						TRUE	16556.7	TRUE	3	11	Amp		0.967392	N	86.1296	N
78	G6	FALSE	15-72h	a-SMA	UNKNOWN	SYBR	None							20.3358	20.2009	0.150005						TRUE	16556.7	TRUE	3	13	Amp		0.95786	N	86.1296	N
73	G1	FALSE	2.5-16h	a-SMA	UNKNOWN	SYBR	None							21.3806	21.4534	0.154717						TRUE	16556.7	TRUE	3	14	Amp		0.982884	N	86.1304	Y
74	G2	FALSE	2.5-16h	a-SMA	UNKNOWN	SYBR	None							21.631	21.4534	0.154717						TRUE	16556.7	TRUE	3	10	Amp		0.979039	N	86.1304	Y
75	G3	FALSE	2.5-16h	a-SMA	UNKNOWN	SYBR	None							21.3484	21.4534	0.154717						TRUE	16556.7	TRUE	3	14	Amp		0.914748	N	85.9767	Y
13	B1	FALSE	2.5-6h	a-SMA	UNKNOWN	SYBR	None							19.8228	19.4828	0.306615						TRUE	16556.7	TRUE	3	13	Amp		0.989301	N	86.4378	N
14	B2	FALSE	2.5-6h	a-SMA	UNKNOWN	SYBR	None							19.2273	19.4828	0.306615						TRUE	16556.7	TRUE	3	12	Amp		0.981016	N	86.2841	N
15	B3	FALSE	2.5-6h	a-SMA	UNKNOWN	SYBR	None							19.3984	19.4828	0.306615						TRUE	16556.7	TRUE	3	13	Amp		0.980099	N	86.2841	N
40	D4	FALSE	2.5-72h	a-SMA	UNKNOWN	SYBR	None							19.5068	19.7789	0.236727						TRUE	16556.7	TRUE	3	12	Amp		0.987044	N	86.2841	N
41	D5	FALSE	2.5-72h	a-SMA	UNKNOWN	SYBR	None							19.8918	19.7789	0.236727						TRUE	16556.7	TRUE	3	11	Amp		0.978789	N	86.2833	N
42	D6	FALSE	2.5-72h	a-SMA	UNKNOWN	SYBR	None							19.938	19.7789	0.236727						TRUE	16556.7	TRUE	3	14	Amp		0.992656	N	86.1296	N
85	H1	FALSE	5-16h	a-SMA	UNKNOWN	SYBR	None							21.248	20.9226	0.372436						TRUE	16556.7	TRUE	3	14	Amp		0.976819	N	86.1304	N
86	H2	FALSE	5-16h	a-SMA	UNKNOWN	SYBR	None							21.0034	20.9226	0.372436						TRUE	16556.7	TRUE	3	13	Amp		0.988488	N	86.1304	N
87	H3	FALSE	5-16h	a-SMA	UNKNOWN	SYBR	None							20.5164	20.9226	0.372436						TRUE	16556.7	TRUE	3	12	Amp		0.974376	N	86.1304	N
25	C1	FALSE	5-6h	a-SMA	UNKNOWN	SYBR	None							21.3154	21.2798	0.135877						TRUE	16556.7	TRUE	3	11	Amp		0.986863	N	86.2841	N
26	C2	FALSE	5-6h	a-SMA	UNKNOWN	SYBR	None							21.1296	21.2798	0.135877						TRUE	16556.7	TRUE	3	12	Amp		0.980573	N	86.2841	N
27	C3	FALSE	5-6h	a-SMA	UNKNOWN	SYBR	None							21.3943	21.2798	0.135877						TRUE	16556.7	TRUE	3	15	Amp		0.96687	N	86.2841	N
52	E4	FALSE	5-72h	a-SMA	UNKNOWN	SYBR	None							20.3409	20.4542	0.10918						TRUE	16556.7	TRUE	3	15	Amp		0.934593	N	86.1304	N
53	E5	FALSE	5-72h	a-SMA	UNKNOWN	SYBR	None							20.463	20.4542	0.10918						TRUE	16556.7	TRUE	3	13	Amp		0.987034	N	86.1296	N
54	E6	FALSE	5-72h	a-SMA	UNKNOWN	SYBR	None							20.5587	20.4542	0.10918						TRUE	16556.7	TRUE	3	12	Amp		0.979503	N	86.1296	N
67	F7	FALSE	0-16h	GAPDH	UNKNOWN	SYBR	None							12.3143	12.432	0.141415						TRUE	8912.32	TRUE	3	8	Inconclusive		0.981481	N	84.2852	N
68	F8	FALSE	0-16h	GAPDH	UNKNOWN	SYBR	None							12.3929	12.432	0.141415						TRUE	8912.32	TRUE	3	6	Inconclusive		0.988184	N	84.2852	N
69	F9	FALSE	0-16h	GAPDH	UNKNOWN	SYBR	None							12.5889	12.432	0.141415						TRUE	8912.32	TRUE	3	6	Inconclusive		0.98715	N	84.2625	N
7	A7	FALSE	0-6h	GAPDH	UNKNOWN	SYBR	None							12.2312	12.3471	0.104056						TRUE	8912.32	TRUE	3	10	Inconclusive		0.971349	N	84.4389	Y
8	A8	FALSE	0-6h	GAPDH	UNKNOWN	SYBR	None							12.3777	12.3471	0.104056						TRUE	8912.32	TRUE	3	7	Inconclusive		0.979389	N	84.5926	Y
9	A9	FALSE	0-6h	GAPDH	UNKNOWN	SYBR	None							12.4325	12.3471	0.104056						TRUE	8912.32	TRUE	3	7	Inconclusive		0.957008	N	84.4161	Y
34	C10	FALSE	15-16h	GAPDH	UNKNOWN	SYBR	None							12.8089	12.8892	0.0967139						TRUE	8912.32	TRUE	3	5	Inconclusive		0.976703	N	84.4161	Y
35	C11	FALSE	15-16h	GAPDH	UNKNOWN	SYBR	None							12.9966	12.8892	0.0967139						TRUE	8912.32	TRUE	3	6	Inconclusive		0.985821	N	84.4161	Y
36	C12	FALSE	15-16h	GAPDH	UNKNOWN	SYBR	None							12.8621	12.8892	0.0967139						TRUE	8912.32	TRUE	3	5	Inconclusive		0.978745	N	84.4161	Y
10	A10	FALSE	10-16h	GAPDH	UNKNOWN	SYBR	None							12.1421	12.1551	0.062254						TRUE	8912.32	TRUE	3	9	Inconclusive		0.988704	N	84.4161	Y
11	A11	FALSE	10-16h	GAPDH	UNKNOWN	SYBR	None							12.2229	12.1551	0.062254						TRUE	8912.32	TRUE	3	6	Inconclusive		0.969131	N	84.4161	Y
12	A12	FALSE	10-16h	GAPDH	UNKNOWN	SYBR	None							12.1004	12.1551	0.062254						TRUE	8912.32	TRUE	3	6	Inconclusive		0.984093	N	84.4161	Y
43	D7	FALSE	10-6h	GAPDH	UNKNOWN	SYBR	None							12.7434	12.4991	0.366552						TRUE	8912.32	TRUE	3	8	Inconclusive		0.985221	N	84.2852	Y
44	D8	FALSE	10-6h	GAPDH	UNKNOWN	SYBR	None							12.0776	12.4991	0.366552						TRUE	8912.32	TRUE	3	7	Inconclusive		0.981195	N	84.4389	Y
45	D9	FALSE	10-6h	GAPDH	UNKNOWN	SYBR	None							12.6764	12.4991	0.366552						TRUE	8912.32	TRUE	3	6	Inconclusive		0.989897	N	84.2625	Y
70	F10	FALSE	10-72h	GAPDH	UNKNOWN	SYBR	None							12.027	12.0578	0.043077						TRUE	8912.32	TRUE	3	7	Inconclusive		0.980798	N	84.2625	Y
71	F11	FALSE	10-72h	GAPDH	UNKNOWN	SYBR	None							12.0395	12.0578	0.043077						TRUE	8912.32	TRUE	3	9	Inconclusive		0.969212	N	84.2625	Y
72	F12	FALSE	10-72h	GAPDH	UNKNOWN	SYBR	None							12.1071	12.0578	0.043077						TRUE	8912.32	TRUE	3	7	Inconclusive		0.979713	N	84.2625	Y
22	B10	FALSE	0-72h	GAPDH	UNKNOWN	SYBR	None							12.4068	12.4366	0.423171						TRUE	8912.32	TRUE	3	8	Inconclusive		0.970263	N	84.2625	N
23	B11	FALSE	0-72h	GAPDH	UNKNOWN	SYBR	None							12.8738	12.4366	0.423171						TRUE	8912.32	TRUE	3	7	Inconclusive		0.987516	N	84.4161	N
24	B12	FALSE	0-72h	GAPDH	UNKNOWN	SYBR	None							12.0291	12.4366	0.423171						TRUE	8912.32	TRUE	3	8	Inconclusive		0.984949	N	84.4161	N
55	E7	FALSE	15-6h	GAPDH	UNKNOWN	SYBR	None							11.8287	11.7447	0.120553						TRUE	8912.32	TRUE	3	8	Inconclusive		0.982124	N	84.2852	N
56	E8	FALSE	15-6h	GAPDH	UNKNOWN	SYBR	None							11.6066	11.7447	0.120553						TRUE	8912.32	TRUE	3	7	Inconclusive		0.989371	N	84.4389	N
57	E9	FALSE	15-6h	GAPDH	UNKNOWN	SYBR	None							11.7989	11.7447	0.120553						TRUE	8912.32	TRUE	3	7	Inconclusive		0.990992	N	84.2625	N
82	G10	FALSE	15-72h	GAPDH	UNKNOWN	SYBR	None							12.9945	12.9581	0.132859						TRUE	8912.32	TRUE	3	8	Inconclusive		0.972444	N	84.1089	Y
83	G11	FALSE	15-72h	GAPDH	UNKNOWN	SYBR	None							13.069	12.9581	0.132859						TRUE	8912.32	TRUE	3	8	Inconclusive		0.809303	N	83.9554	Y
84	G12	FALSE	15-72h	GAPDH	UNKNOWN	SYBR	None							12.8109	12.9581	0.132859						TRUE	8912.32	TRUE	3	6	Inconclusive		0.989644	N	84.2625	Y
79	G7	FALSE	2.5-16h	GAPDH	UNKNOWN	SYBR	None							12.9519	12.6711	0.349312						TRUE	8912.32	TRUE	3	10	Inconclusive		0.961884	N	84.2852	N
80	G8	FALSE	2.5-16h	GAPDH	UNKNOWN	SYBR	None							12.7814	12.6711	0.349312						TRUE	8912.32	TRUE	3	10	Inconclusive		0.991973	N	84.4389	N
81	G9	FALSE	2.5-16h	GAPDH	UNKNOWN	SYBR	None							12.28	12.6711	0.349312						TRUE	8912.32	TRUE	3	8	Inconclusive		0.984748	N	84.2625	N
19	B7	FALSE	2.5-6h	GAPDH	UNKNOWN	SYBR	None							10.5691	10.7107	0.145504						TRUE	8912.32	TRUE	3	7	Inconclusive		0.988586	N	84.4389	N
20	B8	FALSE	2.5-6h	GAPDH	UNKNOWN	SYBR	None							10.7031	10.7107	0.145504						TRUE	8912.32	TRUE	3	7	Inconclusive		0.988889	N	84.4389	N
21	B9	FALSE	2.5-6h	GAPDH	UNKNOWN	SYBR	None							10.8598	10.7107	0.145504						TRUE	8912.32	TRUE	3	9	Inconclusive		0.991169	N	84.4161	N
46	D10	FALSE	2.5-72h	GAPDH	UNKNOWN	SYBR	None							12.2555	12.7318	0.443489						TRUE	8912.32	TRUE	3	7	Inconclusive		0.989474	N	84.2625	N
47	D11	FALSE	2.5-72h	GAPDH	UNKNOWN	SYBR	None							12.8073	12.7318	0.443489						TRUE	8912.32	TRUE	3	8	Inconclusive		0.983428	N	84.2625	N
48	D12	FALSE	2.5-72h	GAPDH	UNKNOWN	SYBR	None							13.1328	12.7318	0.443489						TRUE	8912.32	TRUE	3	8	Inconclusive		0.981565	N	84.2625	N
91	H7	FALSE	5-16h	GAPDH	UNKNOWN	SYBR	None							12.2298	12.181	0.0575642						TRUE	8912.32	TRUE	3	7	Inconclusive		0.983598	N	84.2852	Y
92	H8	FALSE	5-16h	GAPDH	UNKNOWN	SYBR	None							12.1175	12.181	0.0575642						TRUE	8912.32	TRUE	3	6	Inconclusive		0.994822	N	84.2852	Y
93	H9	FALSE	5-16h	GAPDH	UNKNOWN	SYBR	None							12.1958	12.181	0.0575642						TRUE	8912.32	TRUE	3	6	Inconclusive		0.988114	N	84.2625	Y
31	C7	FALSE	5-6h	GAPDH	UNKNOWN	SYBR	None							12.5548	12.4618	0.305505						TRUE	8912.32	TRUE	3	7	Inconclusive		0.966858	Y	84.2852	N
32	C8	FALSE	5-6h	GAPDH	UNKNOWN	SYBR	None							12.71	12.4618	0.305505						TRUE	8912.32	TRUE	3	5	Inconclusive		0.976344	N	84.4389	N
33	C9	FALSE	5-6h	GAPDH	UNKNOWN	SYBR	None							12.1206	12.4618	0.305505						TRUE	8912.32	TRUE	3	5	Inconclusive		0.955567	N	84.2625	N
58	E10	FALSE	5-72h	GAPDH	UNKNOWN	SYBR	None							12.9279	12.9217	0.222945						TRUE	8912.32	TRUE	3	8	Inconclusive		0.982898	N	84.2625	N
59	E11	FALSE	5-72h	GAPDH	UNKNOWN	SYBR	None							13.1415	12.9217	0.222945						TRUE	8912.32	TRUE	3	8	Inconclusive		0.975206	N	84.2625	N
60	E12	FALSE	5-72h	GAPDH	UNKNOWN	SYBR	None							12.6957	12.9217	0.222945						TRUE	8912.32	TRUE	3	8	Inconclusive		0.988494	N	84.2625	N
Well	Well Position	Omit	Sample Name	Target Name	Task	Reporter	Quencher	Quantity	Quantity Mean	Quantity SD	RQ	RQ Min	RQ Max	CT	Ct Mean	Ct SD	Delta Ct	Delta Ct Mean	Delta Ct SD	Delta Ct SE	Delta Delta Ct	Automatic Ct Threshold	Ct Threshold	Automatic Baseline	Baseline Start	Baseline End	Amp Status	Comments	Cq Conf	HIGHSD	OUTLIERRG	Tm1	Tm2	Tm3	Tm4
61	F1	FALSE	0-16h	Collagen	UNKNOWN	SYBR	None							21.2384	21.1795	0.112118						TRUE	16446.1	TRUE	3	12	Amp		0.988216	N	N	86.2011
62	F2	FALSE	0-16h	Collagen	UNKNOWN	SYBR	None							21.2499	21.1795	0.112118						TRUE	16446.1	TRUE	3	10	Amp		0.981074	N	N	86.0461
63	F3	FALSE	0-16h	Collagen	UNKNOWN	SYBR	None							21.0502	21.1795	0.112118						TRUE	16446.1	TRUE	3	10	Amp		0.985232	N	N	86.0461
1	A1	FALSE	0-6h	Collagen	UNKNOWN	SYBR	None							21.2668	21.4232	0.268341						TRUE	16446.1	TRUE	3	12	Amp		0.975257	N	N	86.3561
2	A2	FALSE	0-6h	Collagen	UNKNOWN	SYBR	None							21.7331	21.4232	0.268341						TRUE	16446.1	TRUE	3	15	Amp		0.986808	N	Y	86.3561
3	A3	FALSE	0-6h	Collagen	UNKNOWN	SYBR	None							21.2698	21.4232	0.268341						TRUE	16446.1	TRUE	3	13	Amp		0.980247	N	N	86.3561
28	B4	FALSE	0-72h	Collagen	UNKNOWN	SYBR	None							21.1558	21.2992	0.157307						TRUE	16446.1	TRUE	3	13	Amp		0.988916	N	N	86.2011
29	B5	FALSE	0-72h	Collagen	UNKNOWN	SYBR	None							21.2743	21.2992	0.157307						TRUE	16446.1	TRUE	3	15	Amp		0.980341	N	N	86.3598
30	B6	FALSE	0-72h	Collagen	UNKNOWN	SYBR	None							21.4675	21.2992	0.157307						TRUE	16446.1	TRUE	3	10	Amp		0.97591	N	N	86.3598
4	A4	FALSE	10-16h	Collagen	UNKNOWN	SYBR	None							20.9719	20.8288	0.135989						TRUE	16446.1	TRUE	3	14	Amp		0.958917	Y	N	86.3561
5	A5	FALSE	10-16h	Collagen	UNKNOWN	SYBR	None							20.8133	20.8288	0.135989						TRUE	16446.1	TRUE	3	12	Amp		0.981812	Y	N	86.3598
6	A6	FALSE	10-16h	Collagen	UNKNOWN	SYBR	None							20.7012	20.8288	0.135989						TRUE	16446.1	TRUE	3	12	Amp		0.987201	Y	N	86.3598
37	D1	FALSE	10-6h	Collagen	UNKNOWN	SYBR	None							21.3344	21.2381	0.0912285						TRUE	16446.1	TRUE	3	16	Amp		0.989265	Y	N	86.2011
38	D2	FALSE	10-6h	Collagen	UNKNOWN	SYBR	None							21.1529	21.2381	0.0912285						TRUE	16446.1	TRUE	3	13	Amp		0.98024	Y	N	86.2011
39	D3	FALSE	10-6h	Collagen	UNKNOWN	SYBR	None							21.2271	21.2381	0.0912285						TRUE	16446.1	TRUE	3	13	Amp		0.986978	Y	N	86.2011
64	F4	FALSE	10-72h	Collagen	UNKNOWN	SYBR	None							19.8455	19.7617	0.272949						TRUE	16446.1	TRUE	3	11	Amp		0.987339	N	N	86.0461
65	F5	FALSE	10-72h	Collagen	UNKNOWN	SYBR	None							19.4566	19.7617	0.272949						TRUE	16446.1	TRUE	3	13	Amp		0.984661	N	N	86.2047
66	F6	FALSE	10-72h	Collagen	UNKNOWN	SYBR	None							19.9829	19.7617	0.272949						TRUE	16446.1	TRUE	3	13	Amp		0.970736	N	N	86.2047
16	C4	FALSE	15-16h	Collagen	UNKNOWN	SYBR	None							20.5207	20.5556	0.117445						TRUE	16446.1	TRUE	3	13	Amp		0.97897	N	N	86.2011
17	C5	FALSE	15-16h	Collagen	UNKNOWN	SYBR	None							20.4596	20.5556	0.117445						TRUE	16446.1	TRUE	3	15	Amp		0.986477	N	N	86.3598
18	C6	FALSE	15-16h	Collagen	UNKNOWN	SYBR	None							20.6866	20.5556	0.117445						TRUE	16446.1	TRUE	3	15	Amp		0.990782	N	N	86.2047
49	E1	FALSE	15-6h	Collagen	UNKNOWN	SYBR	None							20.7613	20.6795	0.102502						TRUE	16446.1	TRUE	3	12	Amp		0.987854	N	N	86.2011
50	E2	FALSE	15-6h	Collagen	UNKNOWN	SYBR	None							20.7126	20.6795	0.102502						TRUE	16446.1	TRUE	3	13	Amp		0.986427	N	N	86.2011
51	E3	FALSE	15-6h	Collagen	UNKNOWN	SYBR	None							20.5645	20.6795	0.102502						TRUE	16446.1	TRUE	3	13	Amp		0.988086	N	N	86.0461
76	G4	FALSE	15-72h	Collagen	UNKNOWN	SYBR	None							20.0511	20.1575	0.14073						TRUE	16446.1	TRUE	3	12	Amp		0.987306	N	N	86.2011
77	G5	FALSE	15-72h	Collagen	UNKNOWN	SYBR	None							20.1043	20.1575	0.14073						TRUE	16446.1	TRUE	3	12	Amp		0.979818	N	N	86.2047
78	G6	FALSE	15-72h	Collagen	UNKNOWN	SYBR	None							20.317	20.1575	0.14073						TRUE	16446.1	TRUE	3	13	Amp		0.973432	N	N	86.0497
73	G1	FALSE	2.5-16h	Collagen	UNKNOWN	SYBR	None							21.0065	21.287	0.245776						TRUE	16446.1	TRUE	3	14	Amp		0.986827	Y	N	86.0461
74	G2	FALSE	2.5-16h	Collagen	UNKNOWN	SYBR	None							21.3897	21.287	0.245776						TRUE	16446.1	TRUE	3	13	Amp		0.979336	Y	N	86.0461
75	G3	FALSE	2.5-16h	Collagen	UNKNOWN	SYBR	None							21.4648	21.287	0.245776						TRUE	16446.1	TRUE	3	13	Amp		0.984723	Y	N	86.0461
13	B1	FALSE	2.5-6h	Collagen	UNKNOWN	SYBR	None							19.7585	19.8773	0.198697						TRUE	16446.1	TRUE	3	13	Amp		0.98543	N	N	86.3561
14	B2	FALSE	2.5-6h	Collagen	UNKNOWN	SYBR	None							19.7667	19.8773	0.198697						TRUE	16446.1	TRUE	3	12	Amp		0.982199	N	N	86.3561
15	B3	FALSE	2.5-6h	Collagen	UNKNOWN	SYBR	None							20.1067	19.8773	0.198697						TRUE	16446.1	TRUE	3	15	Amp		0.906732	N	Y	86.3561
40	D4	FALSE	2.5-72h	Collagen	UNKNOWN	SYBR	None							19.9854	19.9042	0.149544						TRUE	16446.1	TRUE	3	13	Amp		0.989845	N	N	86.2011
41	D5	FALSE	2.5-72h	Collagen	UNKNOWN	SYBR	None							19.9956	19.9042	0.149544						TRUE	16446.1	TRUE	3	14	Amp		0.991317	N	N	86.2047
42	D6	FALSE	2.5-72h	Collagen	UNKNOWN	SYBR	None							19.7316	19.9042	0.149544						TRUE	16446.1	TRUE	3	9	Amp		0.982526	N	N	86.2047
85	H1	FALSE	5-16h	Collagen	UNKNOWN	SYBR	None							21.2501	21.1007	0.161638						TRUE	16446.1	TRUE	3	16	Amp		0.914714	N	N	86.0461
86	H2	FALSE	5-16h	Collagen	UNKNOWN	SYBR	None							20.9291	21.1007	0.161638						TRUE	16446.1	TRUE	3	11	Amp		0.980188	N	N	86.0461
87	H3	FALSE	5-16h	Collagen	UNKNOWN	SYBR	None							21.1227	21.1007	0.161638						TRUE	16446.1	TRUE	3	12	Amp		0.975374	N	N	86.0461
25	C1	FALSE	5-6h	Collagen	UNKNOWN	SYBR	None							20.9417	21.3416	0.360259						TRUE	16446.1	TRUE	3	11	Amp		0.986514	N	N	86.2011
26	C2	FALSE	5-6h	Collagen	UNKNOWN	SYBR	None							21.4425	21.3416	0.360259						TRUE	16446.1	TRUE	3	13	Amp		0.986361	N	N	86.2011
27	C3	FALSE	5-6h	Collagen	UNKNOWN	SYBR	None							21.6407	21.3416	0.360259						TRUE	16446.1	TRUE	3	14	Amp		0.98627	N	N	86.2011
52	E4	FALSE	5-72h	Collagen	UNKNOWN	SYBR	None							19.5089	19.8396	0.300271						TRUE	16446.1	TRUE	3	11	Amp		0.983758	N	N	86.2011
53	E5	FALSE	5-72h	Collagen	UNKNOWN	SYBR	None							19.9146	19.8396	0.300271						TRUE	16446.1	TRUE	3	12	Amp		0.986018	N	N	86.2047
54	E6	FALSE	5-72h	Collagen	UNKNOWN	SYBR	None							20.0952	19.8396	0.300271						TRUE	16446.1	TRUE	3	13	Amp		0.982469	N	N	86.2047

## Sheet: Results2
Well	Well Position	Omit	Sample Name	Target Name	Task	Reporter	Quencher	Quantity	Quantity Mean	Quantity SD	RQ	RQ Min	RQ Max	CT	Ct Mean	Ct SD	Delta Ct	Delta Ct Mean	Delta Ct SD	Delta Ct SE	Delta Delta Ct	Automatic Ct Threshold	Ct Threshold	Automatic Baseline	Baseline Start	Baseline End	Amp Status	Comments	Cq Conf	Tm1	Tm2	Tm3	Tm4
14	B2	FALSE	24h 0ng	a-SMA	UNKNOWN	SYBR	None							15.5991	15.5169	0.0712083						TRUE	10374.6	TRUE	3	10	Inconclusive		0.973242	86.477
26	C2	FALSE	24h 0ng	a-SMA	UNKNOWN	SYBR	None							15.4742	15.5169	0.0712083						TRUE	10374.6	TRUE	3	8	Inconclusive		0.963866	86.477
38	D2	FALSE	24h 0ng	a-SMA	UNKNOWN	SYBR	None							15.4774	15.5169	0.0712083						TRUE	10374.6	TRUE	3	10	Inconclusive		0.975887	86.3222
17	B5	FALSE	24h 10ng	a-SMA	UNKNOWN	SYBR	None							14.6734	14.9003	0.203293						TRUE	10374.6	TRUE	3	8	Inconclusive		0.961062	86.4717
29	C5	FALSE	24h 10ng	a-SMA	UNKNOWN	SYBR	None							15.0658	14.9003	0.203293						TRUE	10374.6	TRUE	3	10	Inconclusive		0.968013	86.3169
41	D5	FALSE	24h 10ng	a-SMA	UNKNOWN	SYBR	None							14.9618	14.9003	0.203293						TRUE	10374.6	TRUE	3	11	Inconclusive		0.976495	86.3169
18	B6	FALSE	24h 15ng	a-SMA	UNKNOWN	SYBR	None							14.8017	14.8753	0.103731						TRUE	10374.6	TRUE	3	10	Inconclusive		0.96703	86.4717
30	C6	FALSE	24h 15ng	a-SMA	UNKNOWN	SYBR	None							14.994	14.8753	0.103731						TRUE	10374.6	TRUE	3	10	Inconclusive		0.97861	86.3169
42	D6	FALSE	24h 15ng	a-SMA	UNKNOWN	SYBR	None							14.8303	14.8753	0.103731						TRUE	10374.6	TRUE	3	9	Inconclusive		0.98479	86.3169
3	A3	FALSE	24h 2.5ng	a-SMA	UNKNOWN	SYBR	None							14.3737	14.404	0.0718283						TRUE	10374.6	TRUE	3	7	Inconclusive		0.938142	86.477
27	C3	FALSE	24h 2.5ng	a-SMA	UNKNOWN	SYBR	None							14.486	14.404	0.0718283						TRUE	10374.6	TRUE	3	10	Inconclusive		0.948401	86.3222
39	D3	FALSE	24h 2.5ng	a-SMA	UNKNOWN	SYBR	None							14.3522	14.404	0.0718283						TRUE	10374.6	TRUE	3	10	Inconclusive		0.951205	86.3222
16	B4	FALSE	24h 5ng	a-SMA	UNKNOWN	SYBR	None							14.7281	14.7449	0.017038						TRUE	10374.6	TRUE	3	8	Inconclusive		0.943973	86.477
28	C4	FALSE	24h 5ng	a-SMA	UNKNOWN	SYBR	None							14.7621	14.7449	0.017038						TRUE	10374.6	TRUE	3	7	Inconclusive		0.961774	86.477
40	D4	FALSE	24h 5ng	a-SMA	UNKNOWN	SYBR	None							14.7446	14.7449	0.017038						TRUE	10374.6	TRUE	3	10	Inconclusive		0.962633	86.3222
7	A7	FALSE	36h 0ng	a-SMA	UNKNOWN	SYBR	None							15.5877	15.5863	0.0887728						TRUE	10374.6	TRUE	3	9	Inconclusive		0.971275	86.4717
19	B7	FALSE	36h 0ng	a-SMA	UNKNOWN	SYBR	None							15.6743	15.5863	0.0887728						TRUE	10374.6	TRUE	3	10	Inconclusive		0.970659	86.4717
43	D7	FALSE	36h 0ng	a-SMA	UNKNOWN	SYBR	None							15.4968	15.5863	0.0887728						TRUE	10374.6	TRUE	3	10	Inconclusive		0.981916	86.3169
10	A10	FALSE	36h 10ng	a-SMA	UNKNOWN	SYBR	None							15.0144	14.9087	0.0952051						TRUE	10374.6	TRUE	3	9	Inconclusive		0.921187	86.4579
34	C10	FALSE	36h 10ng	a-SMA	UNKNOWN	SYBR	None							14.8298	14.9087	0.0952051						TRUE	10374.6	TRUE	3	9	Inconclusive		0.951825	86.3032
46	D10	FALSE	36h 10ng	a-SMA	UNKNOWN	SYBR	None							14.8819	14.9087	0.0952051						TRUE	10374.6	TRUE	3	10	Inconclusive		0.982611	86.3032
11	A11	FALSE	36h 15ng	a-SMA	UNKNOWN	SYBR	None							14.8833	14.789	0.0832425						TRUE	10374.6	TRUE	3	10	Inconclusive		0.921673	86.4579
23	B11	FALSE	36h 15ng	a-SMA	UNKNOWN	SYBR	None							14.7257	14.789	0.0832425						TRUE	10374.6	TRUE	3	9	Inconclusive		0.929295	86.3032
35	C11	FALSE	36h 15ng	a-SMA	UNKNOWN	SYBR	None							14.758	14.789	0.0832425						TRUE	10374.6	TRUE	3	10	Inconclusive		0.970647	86.3032
8	A8	FALSE	36h 2.5ng	a-SMA	UNKNOWN	SYBR	None							14.7104	14.6751	0.0734875						TRUE	10374.6	TRUE	3	9	Inconclusive		0.97096	86.6265
20	B8	FALSE	36h 2.5ng	a-SMA	UNKNOWN	SYBR	None							14.5906	14.6751	0.0734875						TRUE	10374.6	TRUE	3	10	Inconclusive		0.974428	86.4717
32	C8	FALSE	36h 2.5ng	a-SMA	UNKNOWN	SYBR	None							14.7243	14.6751	0.0734875						TRUE	10374.6	TRUE	3	10	Inconclusive		0.966862	86.3169
21	B9	FALSE	36h 5ng	a-SMA	UNKNOWN	SYBR	None							14.717	14.7305	0.0455648						TRUE	10374.6	TRUE	3	9	Inconclusive		0.963267	86.3032
33	C9	FALSE	36h 5ng	a-SMA	UNKNOWN	SYBR	None							14.7813	14.7305	0.0455648						TRUE	10374.6	TRUE	3	8	Inconclusive		0.987714	86.3032
45	D9	FALSE	36h 5ng	a-SMA	UNKNOWN	SYBR	None							14.6932	14.7305	0.0455648						TRUE	10374.6	TRUE	3	9	Inconclusive		0.97276	86.3032
62	F2	FALSE	24h 0ng	Collagen I	UNKNOWN	SYBR	None							17.7499	17.8263	0.0667684						TRUE	20482.7	TRUE	3	9	Inconclusive		0.987672	86.1674
74	G2	FALSE	24h 0ng	Collagen I	UNKNOWN	SYBR	None							17.8735	17.8263	0.0667684						TRUE	20482.7	TRUE	3	13	Amp		0.987626	86.1674
86	H2	FALSE	24h 0ng	Collagen I	UNKNOWN	SYBR	None							17.8556	17.8263	0.0667684						TRUE	20482.7	TRUE	3	10	Inconclusive		0.973029	86.1674
53	E5	FALSE	24h 10ng	Collagen I	UNKNOWN	SYBR	None							17.9638	17.9568	0.0931213						TRUE	20482.7	TRUE	3	10	Inconclusive		0.97438	86.162
65	F5	FALSE	24h 10ng	Collagen I	UNKNOWN	SYBR	None							17.8603	17.9568	0.0931213						TRUE	20482.7	TRUE	3	11	Inconclusive		0.976683	86.3169
89	H5	FALSE	24h 10ng	Collagen I	UNKNOWN	SYBR	None							18.0462	17.9568	0.0931213						TRUE	20482.7	TRUE	3	11	Inconclusive		0.981657	86.3169
54	E6	FALSE	24h 15ng	Collagen I	UNKNOWN	SYBR	None							17.7628	17.9095	0.147899						TRUE	20482.7	TRUE	3	10	Inconclusive		0.979443	86.162
66	F6	FALSE	24h 15ng	Collagen I	UNKNOWN	SYBR	None							17.907	17.9095	0.147899						TRUE	20482.7	TRUE	3	11	Inconclusive		0.975046	86.162
90	H6	FALSE	24h 15ng	Collagen I	UNKNOWN	SYBR	None							18.0586	17.9095	0.147899						TRUE	20482.7	TRUE	3	11	Inconclusive		0.977829	86.3169
51	E3	FALSE	24h 2.5ng	Collagen I	UNKNOWN	SYBR	None							17.1421	17.1723	0.0264777						TRUE	20482.7	TRUE	3	10	Inconclusive		0.987376	86.1674
63	F3	FALSE	24h 2.5ng	Collagen I	UNKNOWN	SYBR	None							17.1833	17.1723	0.0264777						TRUE	20482.7	TRUE	3	9	Inconclusive		0.973535	86.1674
75	G3	FALSE	24h 2.5ng	Collagen I	UNKNOWN	SYBR	None							17.1915	17.1723	0.0264777						TRUE	20482.7	TRUE	3	10	Inconclusive		0.986055	86.1674
52	E4	FALSE	24h 5ng	Collagen I	UNKNOWN	SYBR	None							17.7067	17.7167	0.0447671						TRUE	20482.7	TRUE	3	9	Inconclusive		0.982997	86.1674
64	F4	FALSE	24h 5ng	Collagen I	UNKNOWN	SYBR	None							17.6778	17.7167	0.0447671						TRUE	20482.7	TRUE	3	10	Inconclusive		0.974434	86.1674
88	H4	FALSE	24h 5ng	Collagen I	UNKNOWN	SYBR	None							17.7656	17.7167	0.0447671						TRUE	20482.7	TRUE	3	12	Inconclusive		0.959372	86.3222
55	E7	FALSE	36h 0ng	Collagen I	UNKNOWN	SYBR	None							17.9796	17.9976	0.0435012						TRUE	20482.7	TRUE	3	10	Inconclusive		0.977453	86.162
79	G7	FALSE	36h 0ng	Collagen I	UNKNOWN	SYBR	None							17.966	17.9976	0.0435012						TRUE	20482.7	TRUE	3	11	Inconclusive		0.98035	86.162
91	H7	FALSE	36h 0ng	Collagen I	UNKNOWN	SYBR	None							18.0472	17.9976	0.0435012						TRUE	20482.7	TRUE	3	10	Inconclusive		0.96875	86.162
70	F10	FALSE	36h 10ng	Collagen I	UNKNOWN	SYBR	None							17.3808	17.4287	0.0445211						TRUE	20482.7	TRUE	3	11	Inconclusive		0.975688	86.1485
82	G10	FALSE	36h 10ng	Collagen I	UNKNOWN	SYBR	None							17.4688	17.4287	0.0445211						TRUE	20482.7	TRUE	3	10	Inconclusive		0.974918	86.1485
94	H10	FALSE	36h 10ng	Collagen I	UNKNOWN	SYBR	None							17.4366	17.4287	0.0445211						TRUE	20482.7	TRUE	3	9	Inconclusive		0.961499	86.1485
71	F11	FALSE	36h 15ng	Collagen I	UNKNOWN	SYBR	None							17.3188	17.2808	0.0626776						TRUE	20482.7	TRUE	3	10	Inconclusive		0.963358	86.1485
83	G11	FALSE	36h 15ng	Collagen I	UNKNOWN	SYBR	None							17.3152	17.2808	0.0626776						TRUE	20482.7	TRUE	3	11	Inconclusive		0.968896	86.1485
95	H11	FALSE	36h 15ng	Collagen I	UNKNOWN	SYBR	None							17.2085	17.2808	0.0626776						TRUE	20482.7	TRUE	3	9	Inconclusive		0.977762	86.1485
68	F8	FALSE	36h 2.5ng	Collagen I	UNKNOWN	SYBR	None							17.7095	17.7897	0.104764						TRUE	20482.7	TRUE	3	10	Inconclusive		0.968365	86.3169
80	G8	FALSE	36h 2.5ng	Collagen I	UNKNOWN	SYBR	None							17.7514	17.7897	0.104764						TRUE	20482.7	TRUE	3	11	Inconclusive		0.983177	86.162
92	H8	FALSE	36h 2.5ng	Collagen I	UNKNOWN	SYBR	None							17.9083	17.7897	0.104764						TRUE	20482.7	TRUE	3	12	Inconclusive		0.96388	86.3169
69	F9	FALSE	36h 5ng	Collagen I	UNKNOWN	SYBR	None							17.7049	17.697	0.00782046						TRUE	20482.7	TRUE	3	10	Inconclusive		0.96597	86.1485
81	G9	FALSE	36h 5ng	Collagen I	UNKNOWN	SYBR	None							17.6892	17.697	0.00782046						TRUE	20482.7	TRUE	3	10	Inconclusive		0.975188	86.1485
93	H9	FALSE	36h 5ng	Collagen I	UNKNOWN	SYBR	None							17.6967	17.697	0.00782046						TRUE	20482.7	TRUE	3	12	Inconclusive		0.981003	86.1485
4	A4	FALSE	24h 0ng	GAPDH	UNKNOWN	SYBR	None							16.1449	16.0725	0.101269						TRUE	16455.9	TRUE	3	9	Inconclusive		0.957801	86.359
16	B4	FALSE	24h 0ng	GAPDH	UNKNOWN	SYBR	None							15.9568	16.0725	0.101269						TRUE	16455.9	TRUE	3	8	Inconclusive		0.957096	86.359
28	C4	FALSE	24h 0ng	GAPDH	UNKNOWN	SYBR	None							16.1158	16.0725	0.101269						TRUE	16455.9	TRUE	3	8	Inconclusive		0.939665	86.2039
7	A7	FALSE	24h 10ng	GAPDH	UNKNOWN	SYBR	None							15.7855	15.6989	0.0779231						TRUE	16455.9	TRUE	3	8	Inconclusive		0.96194	86.3598
19	B7	FALSE	24h 10ng	GAPDH	UNKNOWN	SYBR	None							15.6768	15.6989	0.0779231						TRUE	16455.9	TRUE	3	8	Inconclusive		0.951626	86.2047
43	D7	FALSE	24h 10ng	GAPDH	UNKNOWN	SYBR	None							15.6345	15.6989	0.0779231						TRUE	16455.9	TRUE	3	8	Inconclusive		0.944219	86.0497
8	A8	FALSE	24h 15ng	GAPDH	UNKNOWN	SYBR	None							15.736	15.7847	0.0531803						TRUE	16455.9	TRUE	3	10	Inconclusive		0.968159	86.3598
20	B8	FALSE	24h 15ng	GAPDH	UNKNOWN	SYBR	None							15.8414	15.7847	0.0531803						TRUE	16455.9	TRUE	3	9	Inconclusive		0.969991	86.3598
32	C8	FALSE	24h 15ng	GAPDH	UNKNOWN	SYBR	None							15.7767	15.7847	0.0531803						TRUE	16455.9	TRUE	3	9	Inconclusive		0.943409	86.2047
5	A5	FALSE	24h 2.5ng	GAPDH	UNKNOWN	SYBR	None							15.2466	15.2941	0.0514351						TRUE	16455.9	TRUE	3	10	Inconclusive		0.958174	86.3598
17	B5	FALSE	24h 2.5ng	GAPDH	UNKNOWN	SYBR	None							15.3487	15.2941	0.0514351						TRUE	16455.9	TRUE	3	9	Inconclusive		0.952878	86.3598
41	D5	FALSE	24h 2.5ng	GAPDH	UNKNOWN	SYBR	None							15.287	15.2941	0.0514351						TRUE	16455.9	TRUE	3	8	Inconclusive		0.966718	86.2047
6	A6	FALSE	24h 5ng	GAPDH	UNKNOWN	SYBR	None							15.5952	15.6219	0.0285083						TRUE	16455.9	TRUE	3	9	Inconclusive		0.960614	86.3598
30	C6	FALSE	24h 5ng	GAPDH	UNKNOWN	SYBR	None							15.6185	15.6219	0.0285083						TRUE	16455.9	TRUE	3	9	Inconclusive		0.946643	86.2047
42	D6	FALSE	24h 5ng	GAPDH	UNKNOWN	SYBR	None							15.6519	15.6219	0.0285083						TRUE	16455.9	TRUE	3	8	Inconclusive		0.946219	86.2047
52	E4	FALSE	36h 0ng	GAPDH	UNKNOWN	SYBR	None							15.873	15.8471	0.0292226						TRUE	16455.9	TRUE	3	8	Inconclusive		0.967324	86.0489
64	F4	FALSE	36h 0ng	GAPDH	UNKNOWN	SYBR	None							15.8529	15.8471	0.0292226						TRUE	16455.9	TRUE	3	9	Inconclusive		0.951538	86.0489
76	G4	FALSE	36h 0ng	GAPDH	UNKNOWN	SYBR	None							15.8154	15.8471	0.0292226						TRUE	16455.9	TRUE	3	9	Inconclusive		0.935123	86.0489
55	E7	FALSE	36h 10ng	GAPDH	UNKNOWN	SYBR	None							15.5517	15.5798	0.0451464						TRUE	16455.9	TRUE	3	8	Inconclusive		0.948635	86.0497
67	F7	FALSE	36h 10ng	GAPDH	UNKNOWN	SYBR	None							15.6319	15.5798	0.0451464						TRUE	16455.9	TRUE	3	9	Inconclusive		0.952848	86.0497
79	G7	FALSE	36h 10ng	GAPDH	UNKNOWN	SYBR	None							15.5559	15.5798	0.0451464						TRUE	16455.9	TRUE	3	10	Inconclusive		0.952836	86.0497
56	E8	FALSE	36h 15ng	GAPDH	UNKNOWN	SYBR	None							15.6277	15.6222	0.0327877						TRUE	16455.9	TRUE	3	8	Inconclusive		0.948094	86.0497
68	F8	FALSE	36h 15ng	GAPDH	UNKNOWN	SYBR	None							15.587	15.6222	0.0327877						TRUE	16455.9	TRUE	3	9	Inconclusive		0.943647	86.2047
80	G8	FALSE	36h 15ng	GAPDH	UNKNOWN	SYBR	None							15.6519	15.6222	0.0327877						TRUE	16455.9	TRUE	3	8	Inconclusive		0.965657	86.2047
53	E5	FALSE	36h 2.5ng	GAPDH	UNKNOWN	SYBR	None							15.8195	15.7155	0.157396						TRUE	16455.9	TRUE	3	10	Inconclusive		0.95219	86.2047
77	G5	FALSE	36h 2.5ng	GAPDH	UNKNOWN	SYBR	None							15.5344	15.7155	0.157396						TRUE	16455.9	TRUE	3	9	Inconclusive		0.967978	86.2047
89	H5	FALSE	36h 2.5ng	GAPDH	UNKNOWN	SYBR	None							15.7926	15.7155	0.157396						TRUE	16455.9	TRUE	3	9	Inconclusive		0.9841	86.2047
54	E6	FALSE	36h 5ng	GAPDH	UNKNOWN	SYBR	None							15.7051	15.676	0.0654612						TRUE	16455.9	TRUE	3	9	Inconclusive		0.923657	86.0497
78	G6	FALSE	36h 5ng	GAPDH	UNKNOWN	SYBR	None							15.6011	15.676	0.0654612						TRUE	16455.9	TRUE	3	9	Inconclusive		0.963064	86.0497
90	H6	FALSE	36h 5ng	GAPDH	UNKNOWN	SYBR	None							15.7219	15.676	0.0654612						TRUE	16455.9	TRUE	3	8	Inconclusive		0.945103	86.0497

## Sheet: a-SMA
	0-6h	2.5-6h	5-6h	10-6h	15-6h	0-16h	2.5-16h	5-16h	10-16h	15-16h	0-72h	2.5-72h	5-72h	10-72h	15-72h
GAPDH	12.2312	10.5691	12.5548	12.7434	11.8287	12.3143	12.9519	12.2298	12.1421	12.8089	12.4068	12.2555	12.9279	12.027	12.9945
	12.3777	10.7031	12.71	12.0776	11.6066	12.3929	12.7814	12.1175	12.2229	12.9966	12.8738	12.8073	13.1415	12.0395	13.069
	12.4325	10.8598	12.1206	12.6764	11.7989	12.5889	12.28	12.1958	12.1004	12.8621	12.0291	13.1328	12.6957	12.1071	12.8109
Mean	12.3471	10.7107	12.4618	12.4991	11.7447	12.432	12.6711	12.181	12.1551	12.8892	12.4366	12.7318	12.9217	12.0578	12.9581
a-SMA	21.1043	19.8228	21.3154	21.3501	20.5189	21.2648	21.3806	21.248	20.9172	20.4799	20.9992	19.5068	20.3409	19.4813	20.2275
	21.0473	19.2273	21.1296	21.0713	20.5997	20.9279	21.631	21.0034	20.5044	20.4918	21.4962	19.8918	20.463	19.9052	20.0393
	21.3048	19.3984	21.3943	21.3732	20.5748	21.4096	21.3484	20.5164	20.5978	20.4076	21.2377	19.938	20.5587	19.8536	20.3358
ΔCT	8.75722	9.1121	8.85355	8.85097	8.77418	8.83277	8.70946	9.06703	8.76202	7.59067	8.56259	6.77498	7.41922	7.42348	7.26936
	8.7002	8.51656	8.66782	8.57215	8.85492	8.49582	8.95992	8.82235	8.34927	7.6026	9.05963	7.15992	7.54132	7.84733	7.0812
	8.95774	8.6877	8.93249	8.87405	8.83008	8.97755	8.67732	8.33541	8.44262	7.51843	8.80114	7.20616	7.63705	7.79573	7.37765
Mean	8.80505					8.76871					8.80778
ΔΔCT	-0.0478312	0.30705	0.0484997	0.0459152	-0.0308702	0.0640589	-0.0592579	0.298318	-0.00669746	-1.17805	-0.242464	-2.03007	-1.38583	-1.38157	-1.53569
	-0.104853	-0.288493	-0.137232	-0.232901	0.0498659	-0.272895	0.191204	0.0536334	-0.419442	-1.16611	0.254574	-1.64513	-1.26373	-0.957723	-1.72385
	0.152685	-0.117352	0.127435	0.0689999	0.0250303	0.208836	-0.091391	-0.433305	-0.326096	-1.25028	-0.00391553	-1.59889	-1.168	-1.00932	-1.4274
2^-ΔΔCT	1.03371	0.808293	0.966941	0.968675	1.02163	0.956569	1.04193	0.8132	1.00465	2.2627	1.18301	4.08426	2.61322	2.60553	2.89928
	1.07539	1.22136	1.09979	1.1752	0.966026	1.20823	0.875875	0.963507	1.33741	2.24406	0.838235	3.12776	2.40115	1.94224	3.30317
	0.899575	1.08474	0.915457	0.953299	0.9828	0.865235	1.0654	1.35032	1.25362	2.37888	1.00272	3.02911	2.247	2.01296	2.68962
mean	1.00289	1.03813	0.994064	1.03239	0.990151	1.01001	0.9944	1.04234	1.19856	2.29522	1.00799	3.41371	2.42046	2.18691	2.96402
	24h 0ng	24h 2.5ng	24h 5ng	24h 10ng	24h 15ng	36h 0ng	36h 2.5ng	36h 5ng	36h 10ng	36h 15ng
GAPDH	16.1449	15.2466	15.5952	15.7855	15.736	15.873	15.8195	15.7051	15.5517	15.6277
	15.9568	15.3487	15.6185	15.6768	15.8414	15.8529	15.5344	15.6011	15.6319	15.587
	16.1158	15.287	15.6519	15.6345	15.7767	15.8154	15.7926	15.7219	15.5559	15.6519
Mean	16.0725	15.2941	15.6219	15.6989	15.7847	15.8471	15.7155	15.676	15.5798	15.6222
a-SMA	15.5991	14.3737	14.7281	14.6734	14.8017	15.5877	14.7104	14.717	15.0144	14.8833
	15.4742	14.486	14.7621	15.0658	14.994	15.6743	14.5906	14.7813	14.8298	14.7257
	15.4774	14.3522	14.7446	14.9618	14.8303	15.4968	14.7243	14.6932	14.8819	14.758
ΔCT	-0.473366	-0.920367	-0.893791	-1.02555	-0.982958	-0.25944	-1.00515	-0.959034	-0.565408	-0.738928
	-0.598283	-0.808114	-0.85972	-0.633164	-0.790726	-0.172761	-1.12487	-0.894737	-0.750064	-0.896525
	-0.595058	-0.941876	-0.877263	-0.737118	-0.954411	-0.35029	-0.991181	-0.982812	-0.697971	-0.864204
Mean	-0.555569					-0.26083
ΔΔCT	0.0822032	-0.364798	-0.338222	-0.469982	-0.427389	0.00139014	-0.744318	-0.698204	-0.304578	-0.478097
	-0.0427138	-0.252545	-0.304151	-0.0775954	-0.235157	0.0880696	-0.864043	-0.633906	-0.489233	-0.635695
	-0.0394894	-0.386307	-0.321694	-0.181549	-0.398842	-0.0894597	-0.730351	-0.721982	-0.437141	-0.603374
2^-ΔΔCT	0.944614	1.2877	1.2642	1.38509	1.3448	0.999037	1.67518	1.62248	1.23506	1.39291
	1.03005	1.19131	1.23469	1.05526	1.17703	0.940781	1.82013	1.55176	1.4037	1.55369
	1.02775	1.30704	1.2498	1.1341	1.31845	1.06397	1.65904	1.64945	1.35392	1.51927
mean	1.0008	1.26202	1.24956	1.19148	1.28009	1.00126	1.71812	1.6079	1.33089	1.48862

## Sheet: Collagen I
	0-6h	2.5-6h	5-6h	10-6h	15-6h	0-16h	2.5-16h	5-16h	10-16h	15-16h	0-72h	2.5-72h	5-72h	10-72h	15-72h
GAPDH	12.2312	10.5691	12.5548	12.7434	11.8287	12.3143	12.9519	12.2298	12.1421	12.8089	12.4068	12.2555	12.9279	12.027	12.9945
	12.3777	10.7031	12.71	12.0776	11.6066	12.3929	12.7814	12.1175	12.2229	12.9966	12.8738	12.8073	13.1415	12.0395	13.469
	12.4325	10.8598	12.1206	12.6764	11.7989	12.5889	12.28	12.1958	12.1004	12.8621	12.0291	13.1328	12.6957	12.1071	12.4109
Mean	12.3471	10.7107	12.4618	12.4991	11.7447	12.432	12.6711	12.181	12.1551	12.8892	12.4366	12.7318	12.9217	12.0578	12.9581
Collagen I	21.2668	19.7585	20.9417	21.3344	20.7613	21.2384	21.0065	21.2501	20.9719	20.5207	21.1558	19.9854	19.5089	19.8455	20.0511
	21.7331	19.7667	21.4425	21.1529	20.7126	21.2499	21.3897	20.9291	20.8133	20.4596	21.2743	19.9956	19.9146	19.4566	20.1043
	21.2698	20.1067	21.6407	21.2271	20.5645	21.0502	21.4648	21.1227	20.7012	20.6866	21.4675	19.7316	20.0952	19.9829	20.317
ΔCT	8.91974	9.04775	8.47987	8.83523	9.01655	8.80633	8.33539	9.06911	8.81672	7.6315	8.71926	7.25353	6.58718	7.78767	7.09295
	9.38599	9.056	8.98072	8.65378	8.96789	8.81786	8.71854	8.7481	8.65818	7.57042	8.83772	7.26375	6.99292	7.39879	7.14614
	8.92269	9.39596	9.17888	8.72796	8.81975	8.61815	8.79363	8.94172	8.54606	7.79739	9.0309	6.99977	7.17348	7.92502	7.35891
Mean	9.07614					8.74745					8.86263
ΔΔCT	-0.156397	-0.0283888	-0.596266	-0.240909	-0.0595924	0.0588818	-0.412059	0.321665	0.0692705	-1.11595	-0.14337	-1.6091	-2.27545	-1.07496	-1.76967
	0.309849	-0.0201376	-0.0954168	-0.422363	-0.108253	-0.258285	-0.0289069	0.000658035	-0.0892653	-1.17702	-0.024903	-1.59888	-1.86971	-1.46384	-1.71648
	-0.153452	0.319817	0.102738	-0.348184	-0.256387	-0.457986	0.0461892	0.194277	-0.201384	-0.95006	0.168273	-1.86285	-1.68915	-0.937607	-1.50372
2^-ΔΔCT	1.1145	1.01987	1.5118	1.18174	1.04217	0.960008	1.33058	0.800146	0.95312	2.16738	1.10448	3.05061	4.84148	2.10666	3.40977
	0.806726	1.01406	1.06837	1.34012	1.07792	1.19606	1.02024	0.999544	1.06383	2.26109	1.01741	3.02908	3.6546	2.75841	3.28634
	1.11223	0.801172	0.931264	1.27296	1.19448	1.37362	0.968491	0.874011	1.1498	1.93195	0.889907	3.63727	3.22466	1.91535	2.83573
mean	1.01115	0.945033	1.17048	1.26494	1.10486	1.17656	1.10644	0.891234	1.05558	2.12014	1.00393	3.23898	3.90691	2.26014	3.17728
	24h 0ng	24h 2.5ng	24h 5ng	24h 10ng	24h 15ng	36h 0ng	36h 2.5ng	36h 5ng	36h 10ng	36h 15ng
GAPDH	16.1449	15.2466	15.5952	15.7855	15.736	15.873	15.8195	15.7051	15.5517	15.6277
	15.9568	15.3487	15.6185	15.6768	15.8414	15.8529	15.5344	15.6011	15.6319	15.587
	16.1158	15.287	15.6519	15.6345	15.7767	15.8154	15.7926	15.7219	15.5559	15.6519
Mean	16.0725	15.2941	15.6219	15.6989	15.7847	15.8471	15.7155	15.676	15.5798	15.6222
Collagen I	17.7499	17.1421	17.7067	17.9638	17.7628	17.9796	17.7095	17.7049	17.3808	17.3188
	17.8735	17.1833	17.6778	17.8603	17.907	17.966	17.7514	17.6892	17.4688	17.3152
	17.8556	17.1915	17.7656	18.0462	18.0586	18.0472	17.9083	17.6967	17.4366	17.2085
ΔCT	1.67743	1.84802	2.08482	2.26491	1.97808	2.13245	1.99402	2.02885	1.80094	1.69659
	1.80095	1.88923	2.05594	2.1614	2.12234	2.11887	2.03588	2.01321	1.88894	1.69302
	1.78314	1.89743	2.14378	2.34724	2.27385	2.20008	2.19274	2.0207	1.85672	1.58629
Mean	1.75384					2.15047
ΔΔCT	-0.0764084	0.0941772	0.330976	0.511068	0.224239	-0.0180143	-0.156452	-0.121622	-0.349527	-0.453873
	0.0471115	0.135387	0.3021	0.407557	0.368498	-0.0316003	-0.114592	-0.137259	-0.261529	-0.457447
	0.0292969	0.143583	0.389934	0.593397	0.520008	0.0496146	0.0422761	-0.129765	-0.29375	-0.564177
2^-ΔΔCT	1.05439	0.936806	0.794999	0.701703	0.856046	1.01256	1.11454	1.08796	1.27414	1.36971
	0.967872	0.910425	0.811071	0.753899	0.774589	1.02215	1.08267	1.09981	1.19875	1.37311
	0.979898	0.905268	0.763165	0.66278	0.697368	0.966194	0.971122	1.09412	1.22582	1.47854
mean	1.00072	0.9175	0.789745	0.706127	0.776001	1.0003	1.05611	1.09396	1.2329	1.40712

## Sheet: TGFβ1
TGFβ1									GAPDH
						Mean(TGFβ1)						Mean(GAPDH)		▲ct	▲▲CT
H1	27.8197	27.6139	27.7156			27.7164			18.4765	18.6669	18.5716	18.5717		9.14475	0.00176668
H4	27.662	27.7301	27.7984			27.7302			17.8484	17.863	17.8579	17.8565		9.87372	0.00106589
H6	28.4021	28.3988	28.4044			28.4018			15.5284	15.6765	15.7017	15.6355		12.7663	0.000143541
H8	28.377	28.4582	28.3061			28.3805			20.2394	20.3615	20.4848	20.3619		8.01857	0.00385629
H7	27.3272	27.3072	27.287			27.3072			16.541	16.3598	16.2945	16.3985		10.9087	0.000520176
H3	28.8551	28.8675	28.8432			28.8553			15.8853	16.0106	16.1893	16.0284		12.8269	0.000137631
H25	25.6384	25.6578	25.6759			25.6574			20.969	20.9562	20.963	20.9627		4.69466	0.038616
H27	25.6906	25.6937	25.6861			25.6901			21.2165	21.2135	21.2227	21.2176		4.47257	0.0450426
H28	26.982	26.9675	26.9917			26.9804			22.4356	22.3479	22.3918	22.3918		4.58863	0.0415608
H29	26.3233	26.2806	26.2397			26.2812			21.6108	21.5065	21.561	21.5595		4.72172	0.0378983
H24	25.4015	25.3298	25.5308			25.4207			20.3999	20.5021	20.4904	20.4641		4.95657	0.032205
H27	25.2404	25.1283	25.3515			25.2401			19.698	19.6921	19.7265	19.7055		5.53452	0.0215746
H33	25.8543	25.7379	25.7967			25.7963			19.3488	19.3589	19.3694	19.359		6.43727	0.0115395
H37	24.7909	24.9702	24.881			24.8807			19.2859	19.1448	19.3848	19.2718		5.60884	0.0204914
H38	26.1998	26.2752	26.2371			26.2374			20.8297	20.8644	20.8993	20.8644		5.37294	0.0241315
H43	27.5721	27.4614	27.6822			27.5719			22.066	21.9764	22.0212	22.0212		5.55073	0.0213336
H42	25.2362	25.3628	25.6507			25.4166			17.3241	17.1303	17.242	17.2321		8.18445	0.00343743
H70	27.013	27.206	27.1507			27.1232			19.6835	19.7892	19.8934	19.7887		7.33452	0.00619569
H47	26.2335	26.2579	26.2781			26.2565			19.8638	19.8202	19.9031	19.8624		6.39413	0.0118898
H48	25.5379	25.5915	25.5667			25.5654			19.3822	19.4591	19.4228	19.4214		6.14402	0.0141405
H55	27.9424	27.9032	27.8645			27.9034			22.885	22.9006	22.9148	22.9001		5.00322	0.0311803
H56	26.91	27.0301	26.9864			26.9755			22.1394	22.0293	21.9791	22.0493		4.92625	0.0328891
H46	28.3451	28.1511	28.2313			28.2425			21.8602	21.6933	21.7321	21.7619		6.48059	0.0111982
H51	31.6926	31.7944	31.834			31.7737			25.4588	25.3921	25.5823	25.4778		6.29593	0.0127273
